1 Title: Polar pattern formation induced by contact following locomotion in a  
2 multicellular system

3

4 Authors: Masayuki Hayakawa<sup>1</sup>, Tetsuya Hiraiwa<sup>2,3</sup>, Yuko Wada<sup>1</sup>, Hidekazu  
5 Kuwayama<sup>4</sup>, Tatsuo Shibata<sup>1\*</sup>

6

7 Affiliations

8 <sup>1</sup>Laboratory for Physical Biology, RIKEN Center for Biosystems Dynamics Research,  
9 Kobe 650-0047, Japan

10 <sup>2</sup>Mechanobiology Institute, National University of Singapore, Singapore 117411,  
11 Singapore.

12 <sup>3</sup>Universal Biology Institute, University of Tokyo, 7-3-1 Hongo Bunkyo-ku, Tokyo  
13 113-0033, Japan

14 <sup>4</sup>Faculty of Life and Environmental Sciences, University of Tsukuba, Tennodai, 1-1-1,  
15 Tsukuba, Ibaraki 305-8572, Japan

16

17 Correspondence should be addressed to T.S. ([tatsuo.shibata@riken.jp](mailto:tatsuo.shibata@riken.jp))

18

19 **Abstract:**

20

21 **Biophysical mechanisms underlying collective cell migration of eukaryotic cells**  
22 **have been studied extensively in recent years. One paradigm that induces cells to**  
23 **correlate their motions is contact inhibition of locomotion, by which cells**  
24 **migrating away from the contact site. Here, we report that tail-following behavior**  
25 **at the contact site, termed contact following locomotion (CFL), can induce a non-**  
26 **trivial collective behavior in migrating cells. We show the emergence of a traveling**  
27 **band showing polar order in a mutant *Dictyostelium* cell that lacks chemotactic**  
28 **activity. The traveling band is dynamic in the sense that it continuously assembled**  
29 **at the front of the band and disassembled at the back. A mutant cell lacking cell**  
30 **adhesion molecule TgrB1 did not show both the traveling band formation and**  
31 **CFL. We thus conclude that CFL is the cell-cell interaction underlying the**  
32 **traveling band formation. We then develop an agent-based simulation with CFL,**  
33 **which shows the role of CFL in the formation of traveling band. We further show**  
34 **that the polar order phase consists of subpopulations that exhibit characteristic**  
35 **transversal motions with respect to the direction of band propagation. These**

36 **findings describe a novel mechanism of collective cell migration involving cell–cell**  
37 **interactions capable of inducing traveling band with polar order.**

38

39

40

## 41 **Introduction**

42 The collective migration of eukaryotic cells plays crucial roles in processes such as  
43 wound healing, tumor progression, and morphogenesis, and has been the focus of  
44 extensive study(Haeger et al., 2015). The collective effects are typically associated with  
45 cell–cell interactions, such as long-range interaction mediated by secreted chemicals or  
46 short-range stable cohesive interaction mediated by adhesion molecules. However, the  
47 study of self-propelled particles has revealed that motile elements which lack such  
48 activities may nonetheless give rise to dynamic collective motion, such as a traveling  
49 band(Chaté et al., 2008; Ginelli et al., 2010; Ohta and Yamanaka, 2014; Solon et al.,  
50 2015), mediated by a relatively simple transient short-range interaction, such as  
51 alignment interaction(Marchetti et al., 2013; Vicsek et al., 1995; Vicsek and Zafeiris,  
52 2012). The emergence of such collective motions of self-propelled particles has been  
53 observed in a wide variety of systems, ranging from animal flocks(Ballerini et al., 2008),  
54 bacteria swarms(Wioland et al., 2013; Zhang et al., 2010), and cell assemblies(Szabó et  
55 al., 2006) to biopolymers and molecular motors(Butt et al., 2010; Sumino et al., 2012;  
56 Weber and Semmrich, 2010). For some of these systems, the connection between a  
57 macroscopic collective behavior and the microscopic dynamics of its constituents has  
58 been established. For instance, in biopolymers and molecular motors, traveling band  
59 formation is induced by local physical interactions among constituent elements(Sumino  
60 et al., 2012; Suzuki et al., 2015; Weber and Semmrich, 2010). In the case of eukaryotic  
61 cells, however, there has been no report to link traveling band formation to short-range  
62 cell–cell interactions.

63 The social amoeba *Dictyostelium discoideum* is a model organism for the study of  
64 collective cell migration. The coordinated movement of cell population is achieved by  
65 individual chemotactic motion to the cAMP gradient, which is formed in a self-  
66 organized way. However, a mutant cell that lacks chemotactic activity to cAMP still  
67 exhibits an organized coordinated motion that is probably mediated by cell-cell  
68 contacts(Kuwayama, 2013). Here, we demonstrate that this coordinated motion is a  
69 spontaneous polar order formation which phase-separates with a disordered background.  
70 We further show that this polar order formation is attributable to the tail-following  
71 behavior among the migrating cells, which we call contact following locomotion (CFL).

72 We find that the polar ordered phase caused by CFL has an internal structure. An agent-  
73 based model with CFL further reveals that this internal structure is characteristic of the  
74 CFL-induced polar order formation. Thus, we establish the link between the collective  
75 behavior and the cell-cell interactions. Our findings open new possibilities that the  
76 concept of self-propelled particles contributes to the understanding of a highly  
77 orchestrated biological event of migrating cells in multicellular systems.

78

## 79 **Results**

### 80 **Traveling band formation of non-chemotactic *Dictyostelium* cells**

81 In the present study, we investigated collective cellular motion in a mutant strain of  
82 *Dictyostelium discoideum*, known as “KI cell,” which lacks all chemotactic  
83 activity(Kuwayama, 2013; Kuwayama et al., 1993), and thus does not form a cell  
84 aggregate under starvation conditions. Wildtype *Dictyostelium discoideum* forms an  
85 aggregate as a result of chemotaxis mediated by a self-secreted extracellular  
86 chemoattractant. Under starvation conditions, KI cells spread on a non-nutrient agar  
87 plate show a segregation of cell density, which propagates as bands in around six  
88 hours(Kuwayama, 2013), when the cell density is within a particular range ( $1.0 \times$   
89  $10^5$  cells  $\text{cm}^{-2}$  to  $4.0 \times 10^5$  cells  $\text{cm}^{-2}$  ) (Supplementary Movie 1). Initially, the  
90 traveling bands propagate in random directions with high orientational persistence.  
91 When two bands collide, they appear to pass through each other, retaining their shapes  
92 (Fig. 1a left) (Kuwayama, 2013). However, over time, the propagation directions  
93 gradually become aligned, probably due to weak reorientation of propagation direction  
94 as an effect of collisions. Finally, the bands are arranged almost periodically in space  
95 with a spatial interval of about 1 mm (Fig. 1a right, b).

96 To determine the mechanism underlying this collective cellular motion, we  
97 conducted high-magnification observations. At around 16 hours after cells were seeded  
98 on an agar plate, a punched-out section of the agar plate was placed upside down on the  
99 glass slide, such that the monolayer of cells was sandwiched between agar and glass  
100 (Fig. S1a). These cells formed a high-density area that moved as a band in low-density  
101 area for long periods of time with high orientational persistence (Fig. 1c,d and  
102 Supplementary Movie 2). Whereas the cells in high-density area are packed without  
103 extra space, and thus the cell density is similar across different samples (Fig. S1c), the  
104 size  $W$  of the band along the propagation direction showed a broad distribution, ranging  
105 from  $W = 200 \mu\text{m}$  to  $700 \mu\text{m}$  (N=10). In contrast, the traveling speed  $\langle v_b \rangle = 0.5 \pm$   
106  $0.03 \mu\text{m/s}$  (N=10) was consistent among different bands, independent of size  $W$  (Fig.  
107 S1b).

108

### 109 **Analysis of single cell trajectories**

110 To study the relationship between these collective behaviors and the migration of  
111 individual cells, we next performed cell-tracking analysis. Cellular movements were  
112 recorded by tracing the motion of fluorescent microbeads that were incorporated into  
113 the cells by phagocytosis. Figure 2a shows typical trajectories of individual KI cells.  
114 The distribution of migration speeds indicates that cell migration speed inside the band  
115 is slightly faster than that outside the band (Fig. 2b). The average migration speeds of  
116 individual cells inside and outside the band were  $v_{in} = 0.38 \pm 0.14 \mu\text{m s}^{-1}$  and  $v_{out} =$   
117  $0.30 \pm 0.16 \mu\text{m s}^{-1}$ , respectively. The migration direction of the cells inside the band  
118 was distributed around the direction of band propagation, while the migration direction  
119 outside the band was distributed almost uniformly (Fig. 2c). The mean squared  
120 displacement (MSD) inside the band was proportional to  $t^2$  for more than  $10^3$  s (Fig.  
121 2d). In contrast, the MSD outside the band exhibited a transition at around 100 s. from a  
122 persistent motion proportional to  $t^2$ , to a random motion proportional to  $t$ , which  
123 indicates that this motion can be described as a persistent random motion with no  
124 preferred direction (Fig. 2d). This observed directional randomness reflects the effects  
125 of cellular collisions, as well as its intrinsic nature of single cells. In sum, cells inside  
126 the band exhibit directionally persistent motions, whereas cells outside move randomly.

127

### 128 **Propagation of cell density profile**

129 We then compared the average cell speed inside the band  $v_{in}$  and the band  
130 propagation speed  $v_b$ , (Fig. 2e), and found that the band propagates faster than the cell  
131 migration speed for all samples investigated. This implies turnover of cells in the band,  
132 and that the band is continuously assembled at the front of the band and disassembled at  
133 the back. Thus, it is the cell density profile that shows propagation as a  
134 band(Kuwayama, 2013).

135

### 136 **Analysis of multicellular movement reveals polar order formation**

137 To quantitatively characterize the multicellular movement, we introduce the local  
138 polar order parameter,  $\varphi(n, t) = \left| \langle \mathbf{v}_i(t) / |\mathbf{v}_i(t)| \rangle_{i \in \mathcal{L}(n)} \right|$ , obtained from the  
139 instantaneous cell velocity  $\mathbf{v}_i(t)$ , where  $\mathcal{L}(n)$  is the  $n$ th domain along the direction of  
140 band propagation (see Supplementary text). In the high-density region that propagates  
141 as a band,  $\varphi(n, t)$  reaches around 0.8, while  $\varphi(n, t)$  in the low-density area remained  
142 below 0.4 (Fig. 3a). Thus, the high-density region is polar-ordered phase, which  
143 propagates in the low-density disordered phase. The polar order parameter of the band



144 showed intersample variability, and was distributed from 0.6 to 0.85 (Fig. 3b). We  
145 found that the order parameter of band was positively correlated with the width of band  
146  $W$  (Fig. 3b).

147

### 148 **Internal structure in the polar ordered region**

149 The polar order phase is not completely homogeneous with respect to migration  
150 direction, but exhibits heterogeneity; this is related to the underlying assembly  
151 mechanism. This heterogeneity can be visualized in the velocity field obtained by  
152 optical flow, in which the direction of cell migration can be distinguished by color (Fig.  
153 3c and Supplementary movie 3). The size-dependent squared local order parameter  
154  $\langle \varphi_l^2(s) \rangle$  (see Supplementary text) shows a logarithmic decay with area  $S$  (Fig. 3e),  
155 indicating that this heterogeneity is not spatially uncorrelated. Within the band (Fig. 3c  
156 bottom), the migration direction was widely distributed from about 145 to 210 degrees  
157 (a black line in Fig. 3f). The probability density functions (pdf) of the migration  
158 direction obtained for the four regions (Fig. 3c bottom (i–iv)) show peaks at different  
159 directions (Fig. 3f), indicating the presence of two subpopulations; one in which the  
160 migration direction is  $\sim 160^\circ$  (regions (ii) and (iv)) and another in which it is  $\sim 190^\circ$   
161 (regions (i) and (iii)). These two subpopulations are also recognized in Fig. 3c (bottom)  
162 as the regions with dark blue and light green colors, respectively, forming stripes. These  
163 two types of stripes extend perpendicular to the direction of band propagation, and are  
164 alternately arranged. The typical width of the stripe was around 125  $\mu\text{m}$ , as determined  
165 by the analysis of autocorrelation function (Fig.S2a). The kymograph in Fig. 3d shows  
166 the temporal evolution of the velocity field along the line PQ in Fig. 3c, indicating that  
167 the stripes (light green and dark blue) are almost immobile, suggesting that the same  
168 cells experience the two stripes sequentially. From a reference frame co-moving with  
169 the band, cells move from the front to the end, during which they move downward in a  
170 stripe, and then move upward in another stripe (Fig.S2b). These analyses illustrate that  
171 the polar order phase possesses an internal structure with respect to the migration  
172 direction.

173

### 174 **Contact following locomotion is the cell-cell interaction that induces polar pattern 175 formation**

176 The formation of a polar-ordered phase with an internal structure is ultimately  
177 related to the microscopic interactions between individual cells, which are short-ranged.  
178 In the low-density region, cells are not completely isolated, but rather are often  
179 associated with each other, migrating in single files (Fig.4a and Supplementary movie

180 4). This tail-following behavior has been described for wild-type *Dictyostelium* cells  
181 within aggregation streams (Dormann and Parent, 2002). We call this behavior “contact  
182 following locomotion” (CFL). In low-density assay, when two cells collide, they either  
183 form CFL (Fig. 4b and Supplementary movie 5) or not (Fig. S3a). To quantitatively  
184 characterize CFL, we measured the duration of cell–cell contact after two cells collide.  
185 During the formation of CFL, the typical cell-to-cell distance is given by  $d_a = 24 \mu\text{m}$ .  
186 We measured the time interval during which the distance is less than  $d_a$  from the time  
187 series of the distance between two cells (Fig. S3b). As shown in Fig. 4c, in half of the  
188 cases, cell–cell contact persists for more than 300 sec. To determine whether cells that  
189 form contacts for  $>300$  sec exhibit tail-following behavior, we measured the average  
190 angle  $a$  of the angles  $a_1$  and  $a_2$ , which are the angles of the velocity vectors  $\mathbf{v}_1$  and  $\mathbf{v}_2$   
191 with respect to the vector connecting the two cell centers  $\mathbf{d}$ , respectively (Fig. 4d). In  
192 almost 60% of all cases, the angle  $a$  is  $0\text{--}30^\circ$  (Fig. 4e), indicating tail-following type  
193 CFL.

194 To determine whether CFL is responsible for the collective behavior of KI cells, we  
195 sought a mutant cell that lacks CFL activity. A knockout mutant that fails to express the  
196 cell–cell adhesion molecule TgrB1 exhibits reduced CFL activity (Fujimori et al., 2019).  
197 TgrB1 is known to mediate cell–cell adhesion via a heterophilic interaction with its  
198 partner TgrC1 (Fujimori et al., 2019; Hirose et al., 2011; 2015; C.-L. F. Li et al., 2015).  
199 We first assessed whether the *tgrb1* null mutant forms propagating bands. As in the  
200 control case, under starvation conditions, we spread the *tgrb1* null mutant cells on a  
201 non-nutrient agar plate at a cell density of  $2.0$  to  $3.0 \times 10^5$  cells  $\text{cm}^{-2}$  (see Methods).  
202 However, neither segregation of cell density nor propagating bands appeared  
203 (Supplementary movies 6 and 7.).

204 We then compared locomotive activity between control cells and *tgrb1* null mutants.  
205 The velocity auto-correlation functions  $C(\tau)$  of the isolated single cells showed similar  
206 behaviors (Fig. S3c), indicating that locomotive activity was comparable between KI  
207 cells and the *tgrb1* null mutant cells. We next quantitatively characterized the formation  
208 of cell–cell contacts. We found that in 80% of all cases, cell–cell contact is disrupted  
209 before 300 sec (Fig. 4f), and that only 10% of cells established CFL (Fig. S3d). In  
210 particular, in half of all cases, the cell–cell distance becomes larger than  $d_a$  in 120 sec,  
211 indicating that these cells failed to establish cell–cell contact. Our analyses illustrate that  
212 in the *tgrb1* null mutant, CFL is nearly absent. We conclude that CFL is essential for the  
213 segregation of cell density and the formation of propagating bands.

214

215 **Mathematical modeling of polar pattern formation driven by contact following**  
216 **locomotion.** The collective motion of KI cells induced by the CFL interaction can be  
217 modeled by an agent-based simulation(Hiraiwa, 2019). In the model, particle  $i$  at  
218 position  $\mathbf{r}_i$  self-propels at a constant velocity  $v_0$  in the direction of its own polarity  $\mathbf{q}_i$   
219 subjected to white Gaussian noise. Thus, without interactions, the particles exhibit a  
220 persistent random walk(Hiraiwa et al., 2014). The effect of CFL is introduced so that  
221 polarity  $\mathbf{q}_i$  orients to the location of the adjacent particle  $j$ , when particle  $i$  is located at  
222 the tail of particle  $j$  (parameterized by  $\zeta$ ). In addition to this effect, the particles interact  
223 with each other through volume exclusion interaction, adhesion, and the effect of  
224 polarity  $\mathbf{q}_i$  orienting toward the direction of its velocity  $\mathbf{v}_i = d\mathbf{r}_i/dt$  (parameterized by  
225  $\alpha$ ). For a fixed parameter set ( $\alpha = 0.4$ ; see Supplementary text), without CFL ( $\zeta = 0$ ),  
226 the collective behaviors did not form (Fig. S4). In contrast, with CFL ( $\zeta \geq 0.1$ ), a polar-  
227 ordered phase appeared as a propagating band in the background of disordered phase  
228 (Fig. 3g and Supplementary movies 8). The speeds of the traveling band and particles  
229 within the band were 0.96 and 0.9, respectively, relative to the speed of isolated  
230 particles, indicating that the band is dynamic with assembly in the front and  
231 disassembly in the tail, consistent with our experimental results. From the spatial pattern  
232 shown in Fig. 3gh, in which the migration direction is indicated by color code,  
233 heterogeneity in the migration direction is recognized within the polar-ordered phase. In  
234 the simulation, we studied the pdf of migration direction in regions, whose size is  
235 comparable to that in Fig. 3c ((i)–(iv)), and found that the pdf exhibited peaks at  
236 different directions (Fig. 3i), similar to our experimental results (Fig. 3f). To determine  
237 whether this formation of internal structure is a characteristic of propagating bands  
238 induced by CFL, we studied a propagating band formed by increasing alignment effect  
239  $\alpha$  without CFL ( $\zeta = 0$ ), and found that the pdfs of migration direction exhibit peaks at  
240 closely similar positions, indicating that the migration direction in the ordered phase is  
241 more homogeneous (Fig. S5e). Thus, the formation of internal structure appears to be a  
242 characteristic of the collective behavior induced by CFL. The size-dependent squared  
243 local order parameter  $\langle \varphi_p^2(s) \rangle$  (see Supplementary text) also shows the characteristic  
244 decay with a logarithmic dependence on area  $S$  (Fig. 3e), as observed experimentally.

## 245 **Discussion**

246 In this study, we report that a mutant of *Dictyostelium* cell that lacks all chemotactic  
247 activity exhibits spontaneous segregation into polar ordered solitary band. This pattern  
248 formation is attributable to the cell-cell interaction called contact following locomotion  
249 (CFL). The agent-based model that includes CFL reproduces the observed macroscopic

250 behaviors. Thus, we establish a link between the microscopic cell-cell interactions and  
251 the macroscopic polar pattern formation.

252 We showed that the width of band is distributed widely from  $W = 200 \mu\text{m}$  to  $700$   
253  $\mu\text{m}$  (Fig. S1b). The local cell density within the band is similar across different samples  
254 (Fig. S1c), suggesting that the local cell density may not be a relevant factor. In contrast,  
255 we found the positive correlation between the width and the order parameter within the  
256 band (Fig. 3b). We speculate that if the correlation in the migration direction is  
257 gradually decorrelated from the front to the end of the band, bands with lower order  
258 parameters will be more prone to larger decorrelation in the migration direction.  
259 Consequently, we expect that the stronger the polar order, the wider the band width  $W$ .

260 One characteristic behavior of the present polar pattern formation is the formation of  
261 internal structure, which consists of subpopulations with transversal motions. From the  
262 numerical simulation result, this formation of subpopulation was not seen in the model  
263 without CFL. Thus, the internal structure is a characteristic of CFL induced polar  
264 pattern formation. Resolving how fluctuations in the migration direction perpendicular  
265 to the band propagation direction grow to form subpopulations when CFL is present  
266 remains a question for future study.

267 In this paper, we mainly focused on the behavior of single solitary band. We studied  
268 the traveling band, which was well separated from other bands. Thus, all properties of  
269 single solitary band studied in this paper is independent of interaction between different  
270 bands. In some area, the traveling bands are arranged almost periodically in space with  
271 a spatial interval of about 1 mm (Fig. 1b). How bands interact with each other to reach a  
272 periodic spacing and whether the interval is independent of band width  $W$  are to be  
273 investigated.

274 Wildtype *Dictyostelium discoideum* usually aggregates through chemotaxis to form a  
275 hemispherical mound with a central tip region that regulates the formation of slug-like  
276 multicellular structure(Williams, 2010). Whereas the KI cell alone does not show this  
277 activity, KI cells are able to spontaneously migrate to the central tip region transplanted  
278 from a wildtype slug and undergo normal morphogenesis and cell differentiation; this is  
279 not observed in mutant KI cells lacking *tgrB1*(Kida et al., 2019), suggesting that *tgrB1*-  
280 dependent CFL without chemotaxis allows KI cells to spontaneously migrate in slug.  
281 Furthermore, in wildtype cells, the chemical guidance cue has been shown to cease  
282 during the multicellular phase, which suggests that an alternative mechanism induces  
283 collective cell migration in the multicellular body(Hashimura et al., 2019). We propose  
284 that polar order formation induced by CFL plays an important role in late-stage  
285 morphogenesis in this organism. Contact following locomotion, or chain migration,

286 have been reported in other cell types(D. Li and Wang, 2018). The macroscopic  
287 behaviors reported in this paper may thus be found in other systems as well.

288

289

## 290 **Materials and Methods**

### 291 **Culture condition of KI mutant cells and cell density measurement.**

292 1 mL of *Klebsiella aerogenes* suspended in 5LP medium (0.5% Lactose, 0.5% bactopectone  
293 211677, Optical density = 0.1) was spread on the 9 cm 5LP plate (0.5% Lactose, 0.5%  
294 bactopectone 211677, 1.5% agar), 5LP medium dried, the non-chemotactic *Dictyostelium*  
295 *discoideum*, KI mutant cells were inoculated on the plate. The KI cells were incubated for about  
296 five days at 21 °C. After cultivation, the KI cells and *Klebsiella* on the plate were collected with  
297 a phosphate buffer (PB). To remove the *Klebsiella*, the suspension was centrifuged and discard  
298 as much of the supernatant liquid as possible by aspiration, then clean PB was added. After  
299 repeating this process two times, the number of cells was counted using a hemacytometer.

300

### 301 **Macroscopic observation of the traveling bands.**

302 The washed KI cells were spread (cell density =  $5.0 \times 10^5$  cells/cm<sup>2</sup>) on a 9 cm non-nutrient agar  
303 plate (1.5% agar) to cause starvation. After drying of the PB, the plate was scanned every 15  
304 minutes using a film scanner (V850, EPSON). The brightness in scanner images is inversely  
305 correlated with cell density (Takeuchi et al., 2014). For Fig 1a and b, the original images were  
306 inverted with color that depends on time points.

307

### 308 **Microscopic observation of the traveling bands.**

309 The KI cells were spread (cell density = 2.0 to  $3.0 \times 10^5$  cells/cm<sup>2</sup>) on the non-nutrient agar plate  
310 and incubated at 21 °C for around 16 hours. A punched piece of the agar plate was placed  
311 upside down on the glass slide, and the travelling bands between the agar and glass was  
312 observed by phase contrast imaging using an inverted microscope (TiE, Nikon with a 20x  
313 phase-contrast objective, equipped with an EMCCD camera (iXon+, Andor)).

314

### 315 **Tracking analysis of individual KI cells.**

316 For the tracking analysis, 1 μL of the PB including 3% fluorescent microbeads (ex:441, em:486,  
317 1.0 μm, Polysciences, Inc.) was spread at the same time with the KI cells. The trajectories of the  
318 microbeads were automatically tracked by using the ParticleTracker 2D, a plugin for Image J  
319 (National Institutes of Health, USA). To eliminate the trajectories of the microbeads that was  
320 not internalized by the KI cells, if  $|v_{\text{cell}}|$  was slower than 0.25 μm/s for 300 second continuously,



321 we excluded such trajectories. We also excluded the short trajectories of which continuous  
322 tracked time was shorter than 1 hour.

323

### 324 **The mean squared displacement (MSD).**

325 The MSD (Fig.2d) was calculated using the formula below.

$$326 \quad \text{MSD}(\Delta t) = \frac{1}{N(T - \Delta t)} \sum_{i=1}^N \sum_t^{T-\Delta t} \{\mathbf{r}_i(t + \Delta t) - \mathbf{r}_i(t)\}^2,$$

327 where  $\Delta t$ ,  $T$ , and  $N$  means a time interval, final time, and number of the trajectory, respectively.

328

### 329 **Local polar order parameter.**

330 To obtain the local polar order parameter  $\varphi(n, t)$  shown in Fig. 3a, the picture shown in fig 1c  
331 was divided into  $n$  sections with width  $\Delta x$  ( $\mu\text{m}$ ), and the order parameter was calculated in each  
332 section at each time from the trajectories obtained by the tracking analysis. The local order  
333 parameter  $\varphi$  is defined as

$$334 \quad \varphi(n, t) = \left| \frac{1}{N(n)} \sum_{i \in \mathcal{L}(n)} \frac{\mathbf{v}_i(t)}{|\mathbf{v}_i(t)|} \right|,$$

335 where  $\mathcal{L}(n)$  is the set of cells that satisfy  $(n - 1)\Delta x \leq x_i \leq n\Delta x$ ,  $N(n)$  is number of the cells in  
336  $\mathcal{L}(n)$ ,  $\mathbf{v}_i$  and  $x_i$  are the velocity and  $x$ -position of  $i$ -th fluorescent microbeads, respectively. In this  
337 study,  $n = 14$  and  $\Delta x = 119 \mu\text{m}$ .

338

### 339 **Optical flow analysis.**

340 Optical flow analysis was performed based on the Gunnar-Farneback method using OpenCV  
341 library. In the optical flow analysis, the displacement of each pixel in the original pictures are  
342 characterized by coloring based on the HSV (“hue”, “saturation”, “value”) representation. The  
343 “hue” varies depending on angular variation of each pixel. In this study, a “saturation” and  
344 “value” of the processed images via optical flow was fixed to 150 and 255, respectively. The  
345 sequential images of the traveling band used for this analysis were taken every 2 seconds.

346

347 **Size-dependent squared local order parameter.**

348 To characterize the internal structures of the traveling band, the size-dependent squared local  
349 order parameter  $\langle \varphi_{\ell}^2(S) \rangle$  is introduced (Fig.3e). To obtain the size-dependent squared local  
350 order parameter, we first calculate the squared polar order parameter  $\varphi_{\ell}^2(S)$  within a ROI of size  
351  $S$ , which is defined as

352 
$$\varphi_{\ell}^2(S) = \frac{1}{S^2} \left\{ \left( \sum_{(x,y) \in ROI} \cos \theta(x,y) \right)^2 + \left( \sum_{(x,y) \in ROI} \sin \theta(x,y) \right)^2 \right\}$$

353 where  $\theta(x,y) = hue \times (360/255)$  indicates the angular variation of the pixel at position  
354  $(x,y)$ . The value of  $hue$  was obtained from the optical flow analysis (Fig. 3c). Then,  $\varphi_{\ell}^2(S)$  is  
355 averaged over the entire area to obtain  $\langle \varphi_{\ell}^2(S) \rangle$ . If  $\theta(x,y)$  is a random number without spatial  
356 correlation, as the increase of the area  $S$ ,  $\langle \varphi_{\ell}^2(S) \rangle$  is expected to decay in proportion to  $S^{-1}$ .

357

358 **Autocorrelation function of transverse motion with respect to the band propagation**  
359 **direction.**

360 Because the band show propagation in  $x$ -direction, autocorrelation function of transverse motion  
361  $C_{\sin}$  is defined using  $y$ -component of motion as

362 
$$C_{\sin}(\Delta x) = \frac{1}{Y(X - \Delta x)} \sum_{y=1}^Y \sum_{x=1}^{X-\Delta x} \sin \theta(x,y) \sin \theta(x + \Delta x, y),$$

363 where  $\Delta x$  is pixel interval along the  $x$ -axis.  $C_{\sin}$  was plotted after that unit of  $\Delta x$  is converted to  
364 the length.

365

366 **Preparation of *tgrb1* null mutant cells.**

367 The gene disruption construct for *tgrb1* was synthesized by a polymerase chain reaction (PCR)-  
368 dependent technique (Kuwayama et al., 2002). Briefly, the 5'-flanking region of the construct  
369 was amplified with two primers, 5'-CAACAGGTGGAGACTTCGGG-3 and 5'-  
370 GTAATCATGGTCATAGCTGTTTCCTGCAGGCCAGCAGTAATAGTTGGAG-3. The 3-

371 flanking region of the construct was amplified with primers, 5-  
372 CACTGGCCGTCGTTTTACAACGTCGACGAGAACTGTTGATTCTGATGG-3 and 5-  
373 CTTGGTCCTGAACGAACTCC-3. The bsr cassette in the multicloning site of pUCBsr Bam  
374 [Adachi et al., 1994] was amplified using the primer pair 5-  
375 CTGCAGGAAACAGCTATGACCATGATTAC-3 and 5-  
376 GTCGACGTTGTAAAACGACGGCCAGTG-3, both of which are complementary to the two  
377 underlined regions, respectively. The three amplified fragments were subjected to fusion PCR  
378 that produced the required gene-targeting construct. The gene-targeting constructs were cloned  
379 using a TOPO TA cloning kit for sequencing (ThermoFisher Scientific MA, USA). The linear  
380 construct was amplified by PCR using the outermost primers up to 10 µg. and transformed into  
381 KI-5 cells. The KO clones were selected by genomic PCR using the outermost primers.

382

### 383 **Culture condition and starvation treatment of *tgrb1* mutant null cells.**

384 The *tgrb1* null cells were cultured in HL5 medium (1.43% Proteose Peptone 211684, 0.72%  
385 Yeast Extract 212750, 1.43% Glucose, 0.05% KH<sub>2</sub>PO<sub>4</sub>, 0.13% Na<sub>2</sub>HPO<sub>4</sub>·12H<sub>2</sub>O) at 21 degree  
386 Celsius. After reaching confluent, cells on the bottom were peeled off and collected, then  
387 washed two times with a centrifuge and PB. Next, the *tgrb1* null cells were transferred on the  
388 1/3 SM plate (0.33% Glucose, 0.33% bactopectone 211677, 0.45% KH<sub>2</sub>PO<sub>4</sub>, 0.3% Na<sub>2</sub>HPO<sub>4</sub>,  
389 1.5% agar) with *Klebsiella* suspension, and incubated for around two days at 21 °C. After,  
390 through the wash and count, the *tgrb1* null cells were spread on the non-nutrient agar plate, after  
391 which the plate was scanned every 15 minutes using the film scanner.

392

### 393 **Characterization of the contact following locomotion**

394 The KI cells and *tgrb1* null cells for the collision assay were scraped from the traveling bands  
395 and surface of the plate, respectively. The scraped cells were placed on the non-nutrient agar  
396 and sandwiched with the glass. After around one hour incubation at 21 °C, binary collisions of  
397 two cells were observed by microscopy and recorded every 15 seconds. The motion of the cells  
398 was tracked manually using the Manual Tracking, a plugin of Image J. Here, collision was  
399 defined as the contact of pseudopods.

400

### 401 **The velocity autocorrelation function.**

402 Firstly, the migrations of the KI and *tgrbl* null mutant cells were recorded every 20 s for 60 min.  
 403 Here, to extract an intrinsic locomotive activity of the cells, interactions with other cells, wall,  
 404 and etc. were eliminated. Using obtained trajectories of cells that migrate with the velocity  $\mathbf{v}$ ,  
 405 the velocity autocorrelation function  $C(\tau)$  was calculated.  $C(\tau)$  is described with the form of

$$406 \quad C(\tau) = \frac{1}{N(T-\tau)} \sum_{i=1}^N \sum_t^{T-\tau} \{\mathbf{v}_i(t+\tau) - \mathbf{v}_i(t)\}^2,$$

407 where  $\tau$ ,  $t$ ,  $T$ , and  $N$  means a time interval, time, final time, and number of the trajectory,  
 408 respectively (Fig. S3c).

409

#### 410 **Modeling collective motion induced by contact following locomotion.**

411 The collective motion of KI cells induced by the CFL interaction can be modeled by an agent-  
 412 based simulation. In the model, self-propelled particle  $i$  at position  $\mathbf{r}_i$  moves at a constant  
 413 velocity  $v_0$  in the direction of its own polarity  $\mathbf{q}_i$  subjected to white Gaussian noise. Thus,  
 414 without interactions, the particles exhibit persistent random walk(Hiraiwa et al., 2014).  
 415 Collective motion can be modeled by assuming particle-particle interactions(Hiraiwa, 2019).  
 416 We firstly assume that the particles interact with each other through volume exclusion  
 417 (parameterized by  $\beta$ ) and adhesion (parameterized by  $\gamma$ ). We also assume the feature that the  
 418 polarity of each particle orients to the direction of its velocity  $\mathbf{v}_i = d\mathbf{r}_i/dt$  (parameterized by  
 419  $\alpha$ ); it is known that this assumption can effectively give rise to the alignment interaction  
 420 between the particles when it is combined with the volume exclusion effect(B. Li and Sun,  
 421 2014). (Therefore, we simply refer to this feature as alignment effect in the main text.) As the  
 422 main focus of this article, we incorporate CFL into this model by assuming the particle-particle  
 423 interaction by which polarity  $\mathbf{q}_i$  orients to the location of the adjacent particle  $j$  when particle  $i$   
 424 is located at the tail of particle  $j$  (parameterized by  $\zeta$ ). The equation of motion for the particle  $i$   
 425 are then given by

$$426 \quad \frac{d\mathbf{r}_i}{dt} = v_0 \frac{\mathbf{q}_i}{|\mathbf{q}_i|} - \beta \sum_{j \in \mathcal{N}(i)} R \frac{\mathbf{r}_j - \mathbf{r}_i}{|\mathbf{r}_j - \mathbf{r}_i|^2} + \gamma \sum_{j \in \mathcal{N}(i)} \frac{\mathbf{r}_j - \mathbf{r}_i}{|\mathbf{r}_j - \mathbf{r}_i|} \quad (1)$$

$$427 \quad \frac{d\mathbf{q}_i}{dt} = I\mathbf{q}_i(1 - |\mathbf{q}_i|^2) + \mathbf{C}_i + \alpha \frac{\mathbf{v}_i}{|\mathbf{v}_i|} + \xi_i \quad (2)$$

428 where the second and third terms on the right-hand side of Eq.(1) are the effects of volume  
 429 exclusion and adhesions, respectively. Here,  $\mathcal{N}(i)$  is a set of particles that are contacting with

430 the particle  $i$ , i.e., the particle  $j \in \mathcal{N}(i)$  satisfies  $|\mathbf{r}_j - \mathbf{r}_i| \leq R$ . On the right hand side of Eq.(2),  
 431 the first term shows the self-polarization, the third term gives the effect that the polarity orients  
 432 to the velocity direction  $\mathbf{v}_i/|\mathbf{v}_i|$ , the last term is white Gaussian noise with  $\langle \xi_i \rangle = (0,0)$  and  
 433  $\langle \xi_i(t) \cdot \xi_j(t') \rangle = \sigma^2 \delta_{ij} \delta(t - t')$ , and the second term  $\mathbf{C}_i$  describes the CFL, parameterized by  $\zeta$ ,  
 434 given by

$$435 \quad \mathbf{C}_i = \frac{\zeta}{2} \sum_{j \in \mathcal{N}(i)} \frac{\mathbf{r}_j - \mathbf{r}_i}{|\mathbf{r}_j - \mathbf{r}_i|} \left( 1 + \frac{\mathbf{q}_i}{|\mathbf{q}_i|} \cdot \frac{\mathbf{r}_j - \mathbf{r}_i}{|\mathbf{r}_j - \mathbf{r}_i|} \right). \quad (3)$$

436 Here, when the polarity of particle  $j$ ,  $\mathbf{q}_j$ , and the vector from particles  $i$  to  $j$ ,  $\mathbf{r}_j - \mathbf{r}_i$ , are in the  
 437 same orientation, the maximum following effect is exerted on particle  $i$  to the direction of  
 438 particle  $j$ . Such a situation is expected when particle  $i$  is located in the tail of particle  $j$  with  
 439 respect to the polarity  $\mathbf{q}_j$ . In contrast, when particle  $i$  is located in the front of particle  $j$ ,  $\mathbf{C}_i$   
 440 almost vanishes. The simulation is implemented within a square box of size  $L$  with periodic  
 441 boundary condition. For all simulations, we used fixed parameter values except  $\zeta$  and  $\alpha$ , given  
 442 by  $v_0 = 1.0$ ,  $\beta = 1.0$ ,  $R = 1.0$ ,  $\gamma = 1.20$ , and  $\sigma^2 = 0.4$ . For  $I$  in Eq.(2), we consider the  
 443 situation where  $I$  is infinitely large, so that  $\mathbf{q}$  was projected onto the unit vector  $|\mathbf{q}| = 1$  for the  
 444 numerical simulation. The density of particles per unit area  $\rho$  is given  $\rho = 1$ . The number of  
 445 particles  $n$  is  $n = 80,000$  (Fig. 3ghi and Fig. S5) and  $n = 10,000$  (Fig. S4).

446

#### 447 **Histogram of migration direction in the numerical results.**

448 Firstly, we selected only the ROIs in the vicinity of the band front in the following way: We  
 449 define a ROI as being within the bands if the particle density is higher than 1.16, which  
 450 corresponds to the 2D dense packing fraction of disks,  $\sim 0.91$ . Using this definition, we define  
 451 the ROI as being vicinity of the band front if the ROI is within the band at the last  $F_{ana}$  frames  
 452 whereas it is out of the band at the frames between the last  $F_{ana} + F_{wait} + F_{out}$  and the last  
 453  $F_{ana} + F_{wait}$ . In other words,  $F_{ana}$  means the number of frames to be analyzed and must be  
 454 within the band,  $F_{out}$  means the number of frames to determine the band front (i.e. the frames in  
 455 which the ROI must be still out of the band assuming that the band travels only in one direction),  
 456 and  $F_{wait}$  means the number of the waiting frames (i.e. the frames which are not used at all)  
 457 between these frame sets.

458 The results of this algorithm for CFL-induced ( $\zeta = 0.1$ ,  $\alpha = 0.4$ ) and alignment-induced ( $\zeta =$   
 459  $0.0$ ,  $\alpha = 1.0$ ) bands are shown in Figs. S5a and b, respectively. Here, we used the following sets  
 460 of the parameters for our analysis in this article:  $F_{ana} = 55$ , which corresponds to the time

461 window in the analysis of experimental data.  $F_{wait} = 76$ , with around which the band front can  
462 propagate across one ROI.  $F_{out} = 5$ , which has been empirically determined. The duration  
463 between each frame is  $dt = 0.2$  in the unit of time of our numerical simulation.

464 Secondly, using these near-front ROIs, we calculate the histograms of migration direction  
465  $(d\mathbf{r}_i(t)/dt)/|d\mathbf{r}_i(t)/dt|$  for each ROI using all the  $F_{ana}$  frames ( $t$ ) and the particles ( $i$ ) in it at  
466 each frame. Then, we plot only the histograms for the ROIs which have the top eight and nine  
467 peak probability densities for CFL-induced and alignment-induced bands, respectively. The  
468 results are plotted in Figs. S5c and d, respectively. One can find the clear difference in these  
469 histograms between the CFL-induced and alignment-induced bands. The peak position and  
470 height for the CFL-induced band have large varieties, whereas those for alignment-induced  
471 band are less distributed. Furthermore, the peaks for the CFL-induced band are much higher  
472 than those for alignment-induced band. Figure 3i of the main text and Fig. S5e plot three typical  
473 histograms from Fig. S5c and d, respectively.

474

#### 475 **Acknowledgements**

476 We are grateful to M. Tarama, T. Yamamoto and D. Sipp for critical reading of this  
477 manuscript, and all member of Laboratory for Physical Biology for discussion. This  
478 work was supported by JSPS KAKENHI Grant Numbers JP17J05667 (to M.H.);  
479 JP16K17777 and JP19K03764 (to T.H.); JP26610129 (to H.K.); JP19H00996 (to T.S.);  
480 JST CREST grant number JPMJCR1852, Japan (T.S.)

481

482 **Competing interests** The authors declare that no competing interests exist.

483

#### 484 **Author contributions**

485 M.H. and T.S. designed the research. M.H. and Y.W. performed the experiments, M.H.  
486 and T.S. analyzed the data, H.K. provided KI cell and TgrB1<sup>-</sup> KI cell and supervised the  
487 experiments, T.H. developed and performed the numerical simulation, and M.H., T. H.,  
488 H. K. and T. S. participated in writing the manuscript.

489

#### 490 **Data availability**

491 The data that support the findings of this study are available from the corresponding  
492 author upon reasonable request.

493

494



495 **Figure Legends**

496 **Figure 1**

497 **Segregation of cell density and formation of bands in non-chemotactic *D.***

498 ***discoideum* KI cell. a**, The density profile of three time points with a time interval of 15  
499 min indicated by color-coding (red  $t=0$ , green 15min, blue 30min). Brighter color  
500 indicates higher density. Five (left) and 25 (right) hours after incubation. See also  
501 Supplementary Movie 1. **b**, The intensity profile along the line indicated in (a), showing  
502 a periodic distribution of high-density regions. The inset shows a power spectrum of the  
503 intensity profile, indicating that the spatial interval was about 1 mm. **c**, Time evolution  
504 of phase-contrast image of high-density region (dotted lines) at  $t=2110, 3150, 4200$  sec.,  
505 respectively. The time points correspond to that in Supplemental Movie 2. **d**, High  
506 magnification images of low-density region (i) and high-density region (ii). Arrows  
507 indicate the migration directions of cells.

508

509 **Figure 2**

510 **Analysis of single cell migrations inside and outside the band. a**, Trajectories of  
511 single cells inside (red) and outside (black) the band. These trajectories were taken from  
512 the data shown in Fig. 1c. **b,c**, The distributions of the migration speed (b) and  
513 migration direction (c) inside (pink) and outside (blue) the band. **d**, Mean squared  
514 displacement (MSD) of cell motions inside the band (red), before entering the band  
515 (green) and after leaving the band (blue) **e**, Scatter plot of the band speed  $v_w$  against the  
516 cell speed  $\langle v_{in} \rangle$  within the band. The number of bands investigated is  $N = 10$ .

517

518 **Figure 3**

519 **Analysis of heterogeneity within the ordered phase. a**, Spatial profile of the local  
520 polar order parameter (solid lines) and the number of beads in the intervals (dotted  
521 lines) in Fig. 1c. **b**, Scatter plot of band width against polar order parameter within the  
522 band region. The number of bands studied is  $N = 10$ . **c**, Optical flow images in the  
523 front region of a band  $t=405$  (top) and within the band  $t=1083$  (bottom). See also  
524 Supplementary movies 3 **e**, Kymograph of the optical flow image along the line PQ  
525 shown in c (top). The arrows indicate the average velocity of band  $\langle v_b \rangle$  and the average  
526 cell speed  $\langle v_{in} \rangle$ . **e**, Size-dependent squared local order parameter plotted against the  
527 area  $S$  for the data shown in c. **f**, Probability distribution function (pdf) of the migration  
528 direction within the band region obtained by the optical flow analysis shown in c. The  
529 pdfs (i)-(iv) are obtained in the regions (i)-(iv) in c (bottom), respectively. Average pdf  
530 is shown by the black line. **g**, Snapshot of simulation result showing a polar ordered

531 phase as a propagating band in the background of disordered phase. The color code  
532 indicates the migration direction of individual particle as shown in **c**. See also  
533 Supplementary movies 8. **h**, Magnification of squared area shown in **g**. The size of area  
534 (20x20) is comparable to the whole area shown in **c**. Each arrow indicates the direction  
535 of polarity. **i**, Probability distribution function of the migration direction within the band  
536 region in the simulation (red, green and blue lines). For the choice of ROI, see  
537 Supplementary text. Average pdf is shown by the black line.

538

#### 539 **Figure 4**

540 **Contact following locomotion responsible for band propagation.** **a**, Snapshot of the  
541 contact following locomotion. See also Supplementary movies 4. **b**, Representative time  
542 evolution of collision of two cells. Colored arrows represent the same cell. See also  
543 Supplementary movies 5. **c**, Histogram of the duration of two cell contacts for KI cell  
544 (control). **d**, Schematic of angle  $a_1$  ( $a_2$ ), which is the angle of the velocity vector  $\mathbf{v}_1$   
545 ( $\mathbf{v}_2$ ) with respect to the vector  $\mathbf{d}$  connecting two cell centers. Then, the angle  $a$  is  
546 obtained as the angular average of  $a_1$  and  $a_2$ , i.e.,  $A \cos a =$   
547  $(\cos a_1 + \cos a_2)/2$ ,  $A \sin a = (\sin a_1 + \sin a_2)/2$ . **e**, Histogram of the angle  $a$  for the  
548 KI cells that contact each other for >300 sec. **f**, Histogram of the duration of two cell  
549 contacts for the *tgrb1* null mutant.

550

551

552 **References**

553

- 554 Ballerini M, Cabibbo N, Candelier R, Cavagna A, Cisbani E, Giardina I, Lecomte V,  
555 Orlandi A, Parisi G, Procaccini A, Viale M, Zdravkovic V. 2008. Interaction ruling  
556 animal collective behavior depends on topological rather than metric distance:  
557 Evidence from a field study. *Proc Natl Acad Sci USA* **105**:1232–1237.  
558 doi:10.1073/pnas.0711437105
- 559 Butt T, Mufti T, Humayun A, Rosenthal PB, Khan S, Khan S, Molloy JE. 2010. Myosin  
560 Motors Drive Long Range Alignment of Actin Filaments. *J Biol Chem* **285**:4964–  
561 4974. doi:10.1074/jbc.M109.044792
- 562 Chaté H, Ginelli F, Grégoire G, Raynaud F. 2008. Collective motion of self-propelled  
563 particles interacting without cohesion. *Phys Rev E* **77**:046113.  
564 doi:10.1103/PhysRevE.77.046113
- 565 Dormann D, Parent CA. 2002. Visualizing PI3 kinase-mediated cell-cell signaling  
566 during Dictyostelium development. *Curr Biol* **12**:1178–1188.
- 567 Fujimori T, Nakajima A, Shimada N, Sawai S. 2019. Tissue self-organization based on  
568 collective cell migration by contact activation of locomotion and chemotaxis. *Proc*  
569 *Natl Acad Sci USA* **116**:4291–4296. doi:10.1073/pnas.1815063116
- 570 Ginelli F, Peruani F, Bär M, Chaté H. 2010. Large-Scale Collective Properties of Self-  
571 Propelled Rods. *Phys Rev Lett* **104**:184502. doi:10.1103/PhysRevLett.104.184502
- 572 Haeger A, Wolf K, Zegers MM, Friedl P. 2015. Collective cell migration: guidance  
573 principles and hierarchies. *Trends in Cell Biology* **25**:556–566.  
574 doi:10.1016/j.tcb.2015.06.003
- 575 Hashimura H, Morimoto YV, Yasui M, Ueda M. 2019. Collective cell migration of  
576 Dictyostelium without cAMP oscillations at multicellular stages. *Commun Biol* **2**:34.  
577 doi:10.1038/s42003-018-0273-6
- 578 Hiraiwa T. 2019. Two types of exclusion interactions for self-propelled objects and  
579 collective motion induced by their combination. *Phys Rev E* **99**:012614.  
580 doi:10.1103/PhysRevE.99.012614
- 581 Hiraiwa T, Nagamatsu A, Akuzawa N, Nishikawa M, Shibata T. 2014. Relevance of  
582 intracellular polarity to accuracy of eukaryotic chemotaxis. *Phys Biol* **11**:056002.  
583 doi:10.1088/1478-3975/11/5/056002
- 584 Hirose S, Benabentos R, Ho H-I, Kuspa A, Shaulsky G. 2011. Self-recognition in social  
585 amoebae is mediated by allelic pairs of tiger genes. *Science* **333**:467–470.  
586 doi:10.1126/science.1203903
- 587 Hirose S, Santhanam B, Katoh-Kurosawa M, Shaulsky G, Kuspa A. 2015.

- 588 Allorecognition, via TgrB1 and TgrC1, mediates the transition from unicellularity  
589 to multicellularity in the social amoeba *Dictyostelium discoideum*. *Development*  
590 **142**:3561–3570. doi:10.1242/dev.123281
- 591 Kida Y, Pan K, Kuwayama H. 2019. Some chemotactic mutants can be progress  
592 through development in chimeric populations. *Differentiation* **105**:71–79.  
593 doi:10.1016/j.diff.2019.02.001
- 594 Kuwayama H. 2013. Biological soliton in multicellular movement. *Sci Rep* **3**:2272.  
595 doi:10.1038/srep02272
- 596 Kuwayama H, Ishida S, Van Haastert PJ. 1993. Non-chemotactic *Dictyostelium*  
597 *discoideum* mutants with altered cGMP signal transduction. *J Cell Biol* **123**:1453–  
598 1462. doi:10.1083/jcb.123.6.1453
- 599 Kuwayama H, Obara S, Morio T, Katoh M, Urushihara H, Tanaka Y. 2002. PCR-  
600 mediated generation of a gene disruption construct without the use of DNA ligase  
601 and plasmid vectors. *Nucleic Acids Res* **30**:E2–2. doi:10.1093/nar/30.2.e2
- 602 Li B, Sun SX. 2014. Coherent motions in confluent cell monolayer sheets. *Biophys J*  
603 **107**:1532–1541. doi:10.1016/j.bpj.2014.08.006
- 604 Li C-LF, Chen G, Webb AN, Shauly G. 2015. Altered N-glycosylation modulates  
605 TgrB1- and TgrC1-mediated development but not allorecognition in *Dictyostelium*.  
606 *J Cell Sci* **128**:3990–3996. doi:10.1242/jcs.172882
- 607 Li D, Wang Y-L. 2018. Coordination of cell migration mediated by site-dependent cell-  
608 cell contact. *Proc Natl Acad Sci USA* **115**:10678–10683.  
609 doi:10.1073/pnas.1807543115
- 610 Marchetti MC, Joanny J-F, Ramaswamy S, Liverpool TB, Prost J, Rao M, Simha RA.  
611 2013. Hydrodynamics of soft active matter. *Rev Mod Phys* **85**:1143–1189.  
612 doi:10.1103/RevModPhys.85.1143
- 613 Ohta T, Yamanaka S. 2014. Soliton-like behavior of traveling bands in self-propelled  
614 soft particles. *Progress of Theoretical and Experimental Physics* **2014**:11J01–0.  
615 doi:10.1093/ptep/ptt111
- 616 Solon AP, Chaté H, Tailleur J. 2015. From Phase to Microphase Separation in Flocking  
617 Models: The Essential Role of Nonequilibrium Fluctuations. *Phys Rev Lett*  
618 **114**:068101. doi:10.1103/PhysRevLett.114.068101
- 619 Sumino Y, Nagai KH, Yoshikawa K, Chaté H, Oiwa K. 2012. Large-scale vortex lattice  
620 emerging from collectively moving microtubules. *Nature* **483**:448–452.  
621 doi:10.1038/nature10874
- 622 Suzuki R, Weber CA, Frey E, Bausch AR. 2015. Polar pattern formation in driven  
623 filament systems requires non-binary particle collisions. *Nat Phys* **11**:839–843.

- 624       doi:10.1038/nphys3423
- 625 Szabó B, Szöllösi GJ, Gönci B, Jurányi Z, Selmeczi D, Vicsek T. 2006. Phase transition  
626       in the collective migration of tissue cells: Experiment and model. *Phys Rev E*  
627       **74**:061908. doi:10.1103/PhysRevE.74.061908
- 628 Takeuchi R, Tamura T, Nakayashiki T, Tanaka Y, Muto A, Wanner BL, Mori H. 2014.  
629       Colony-live--a high-throughput method for measuring microbial colony growth  
630       kinetics--reveals diverse growth effects of gene knockouts in Escherichia coli. *BMC*  
631       *Microbiol* **14**:171. doi:10.1186/1471-2180-14-171
- 632 Vicsek T, Czirók A, Ben-Jacob E, Cohen I, Shochet O. 1995. Novel Type of Phase  
633       Transition in a System of Self-Driven Particles. *Phys Rev Lett* **75**:1226–1229.  
634       doi:10.1103/PhysRevLett.75.1226
- 635 Vicsek T, Zafeiris A. 2012. Collective motion. *Physics Reports* **517**:71–140.  
636       doi:10.1016/j.physrep.2012.03.004
- 637 Weber CA, Semmrich C. 2010. Polar patterns of driven filaments. *Nature* **467**:73–77.  
638       doi:10.1038/nature09312
- 639 Williams JG. 2010. Dictyostelium finds new roles to model. *Genetics* **185**:717–726.  
640       doi:10.1534/genetics.110.119297
- 641 Wioland H, Woodhouse FG, Kessler JO, Goldstein RE. 2013. Confinement stabilizes a  
642       bacterial suspension into a spiral vortex. *Phys Rev Lett* **110**:268102.  
643       doi:10.1103/PhysRevLett.110.268102
- 644 Zhang HP, Be'er A, Florin E-L, Swinney HL. 2010. Collective motion and density  
645       fluctuations in bacterial colonies. *Proc Natl Acad Sci USA* **107**:13626–13630.  
646       doi:10.1073/pnas.1001651107
- 647



Fig.1

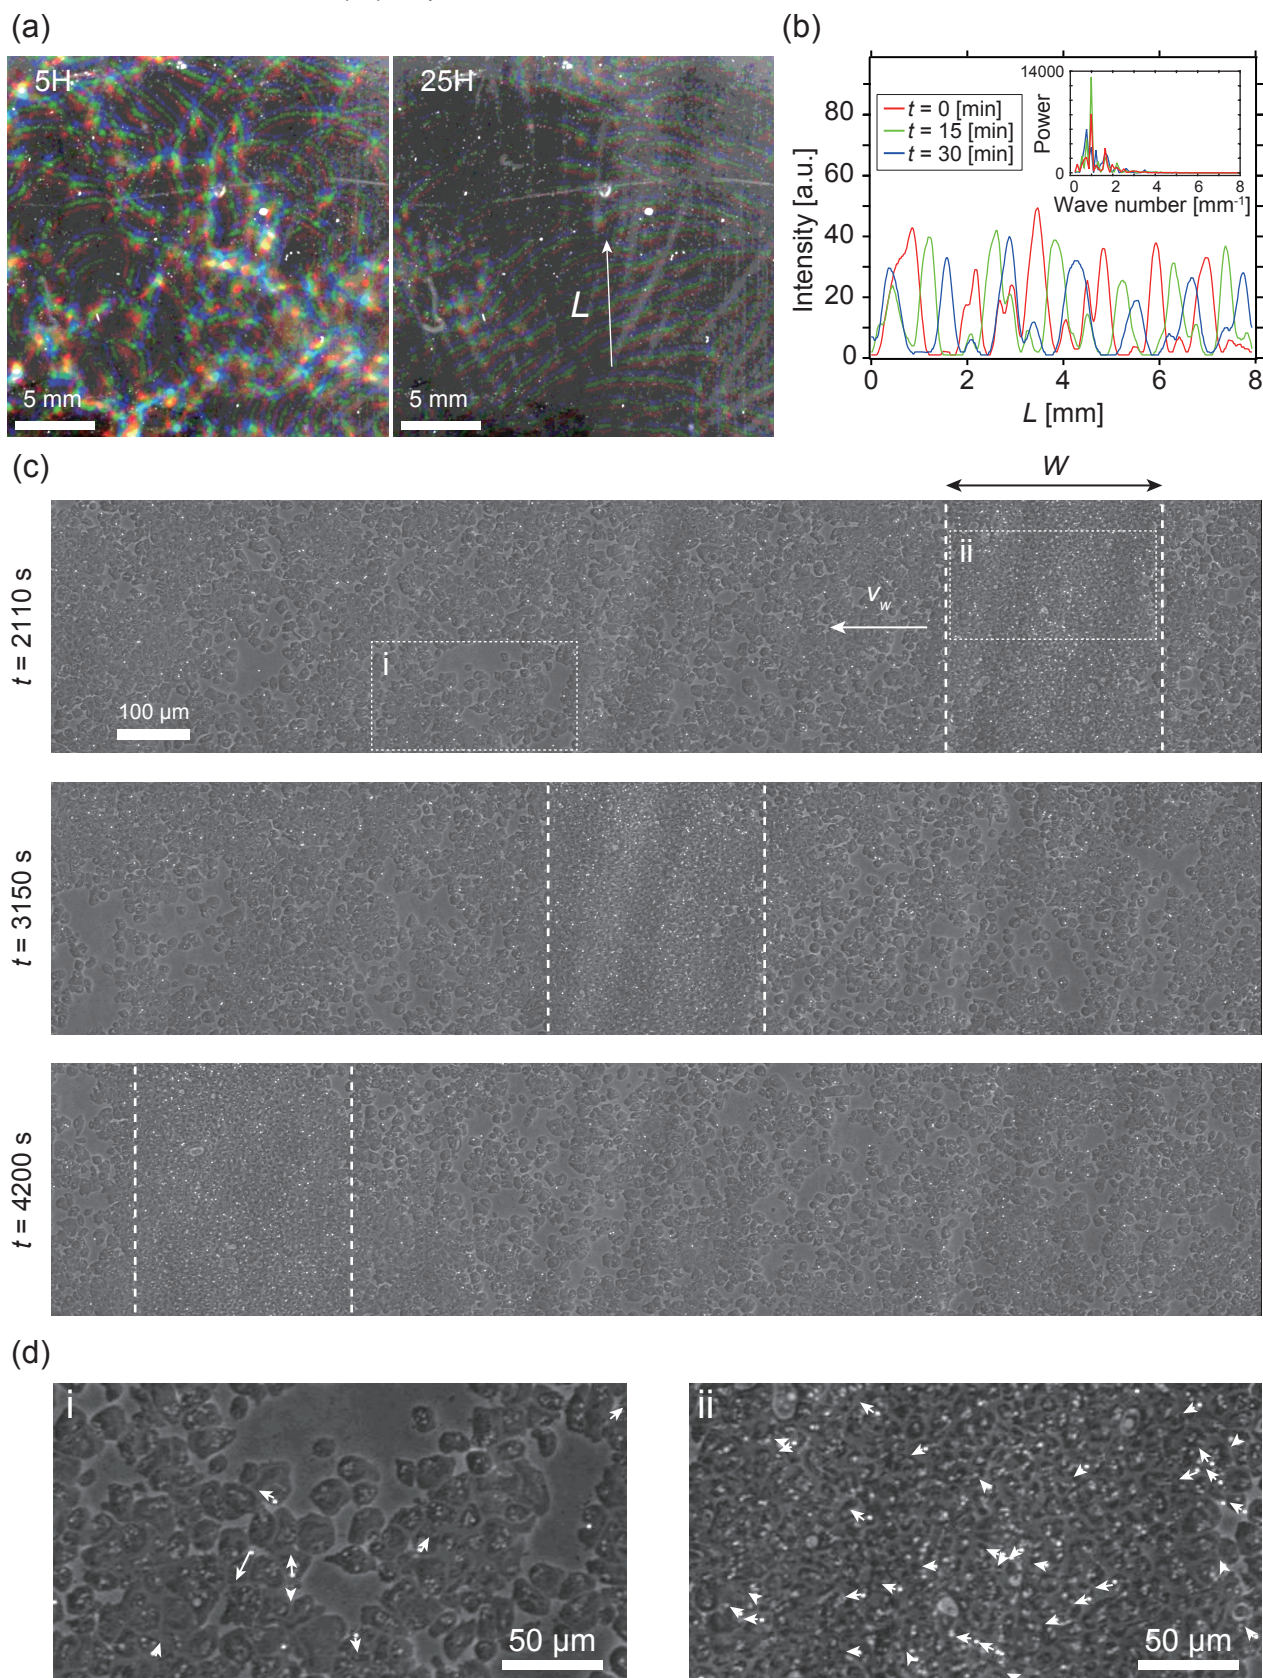



Fig.2

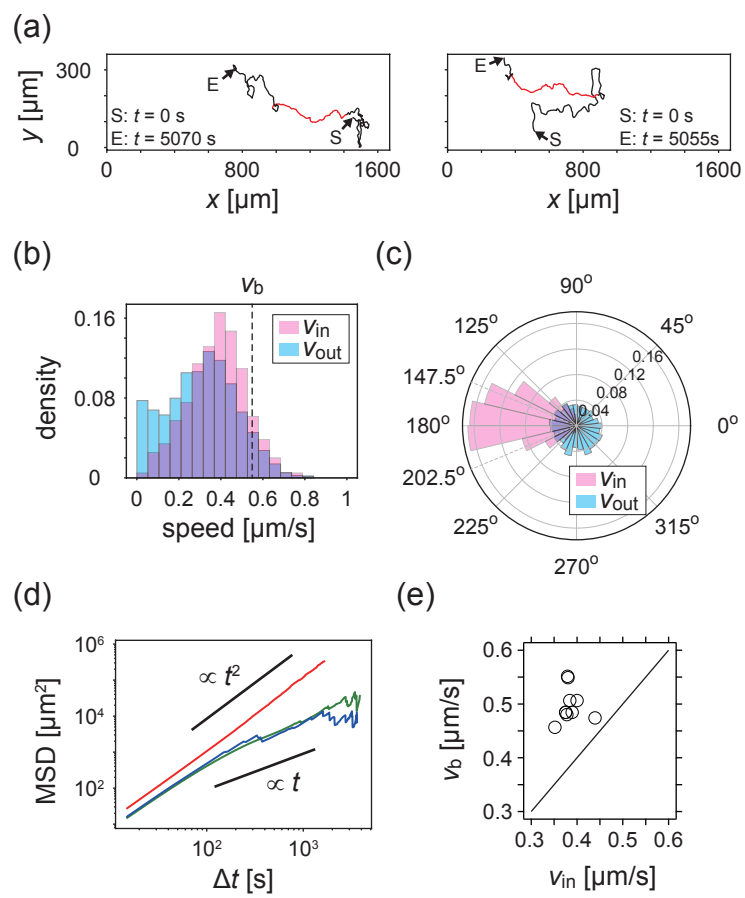

Fig.3

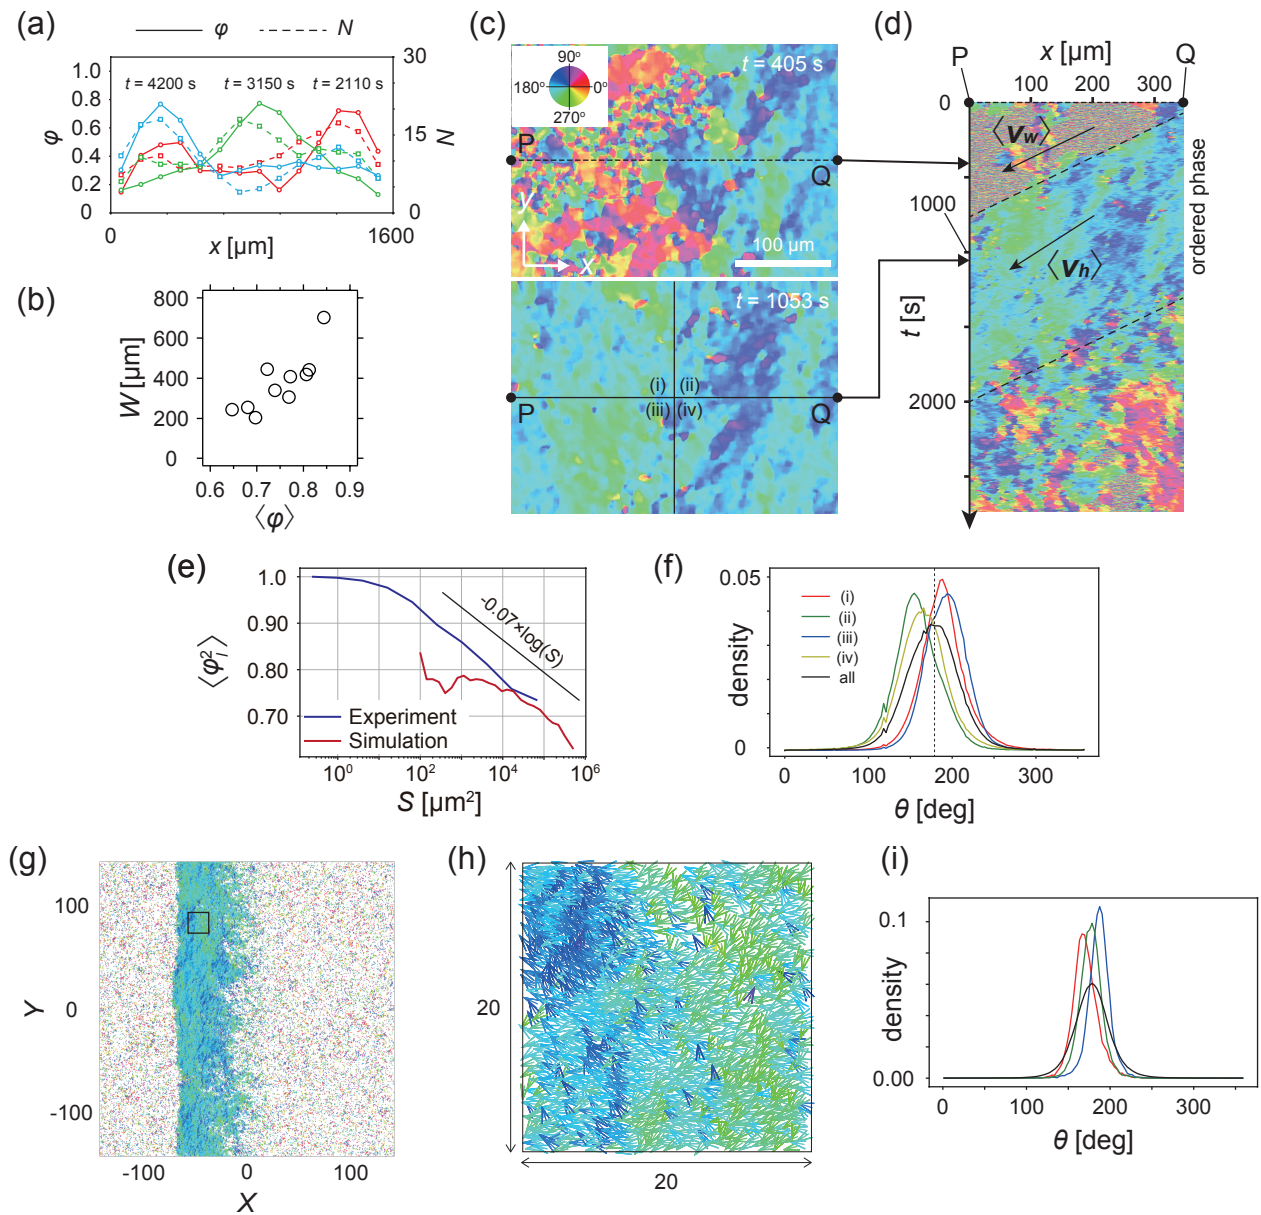

Fig.4

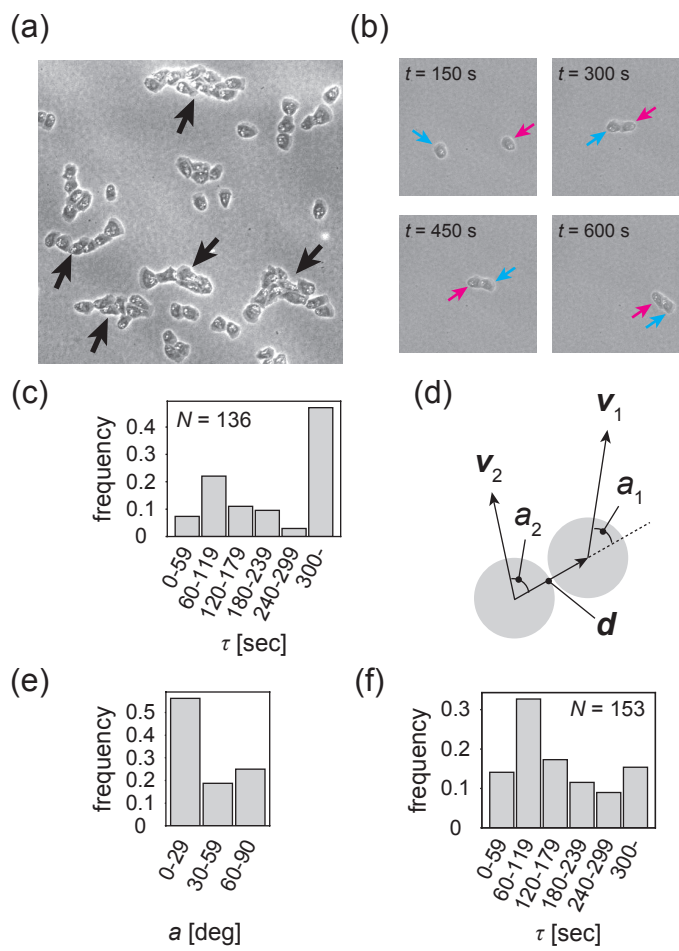



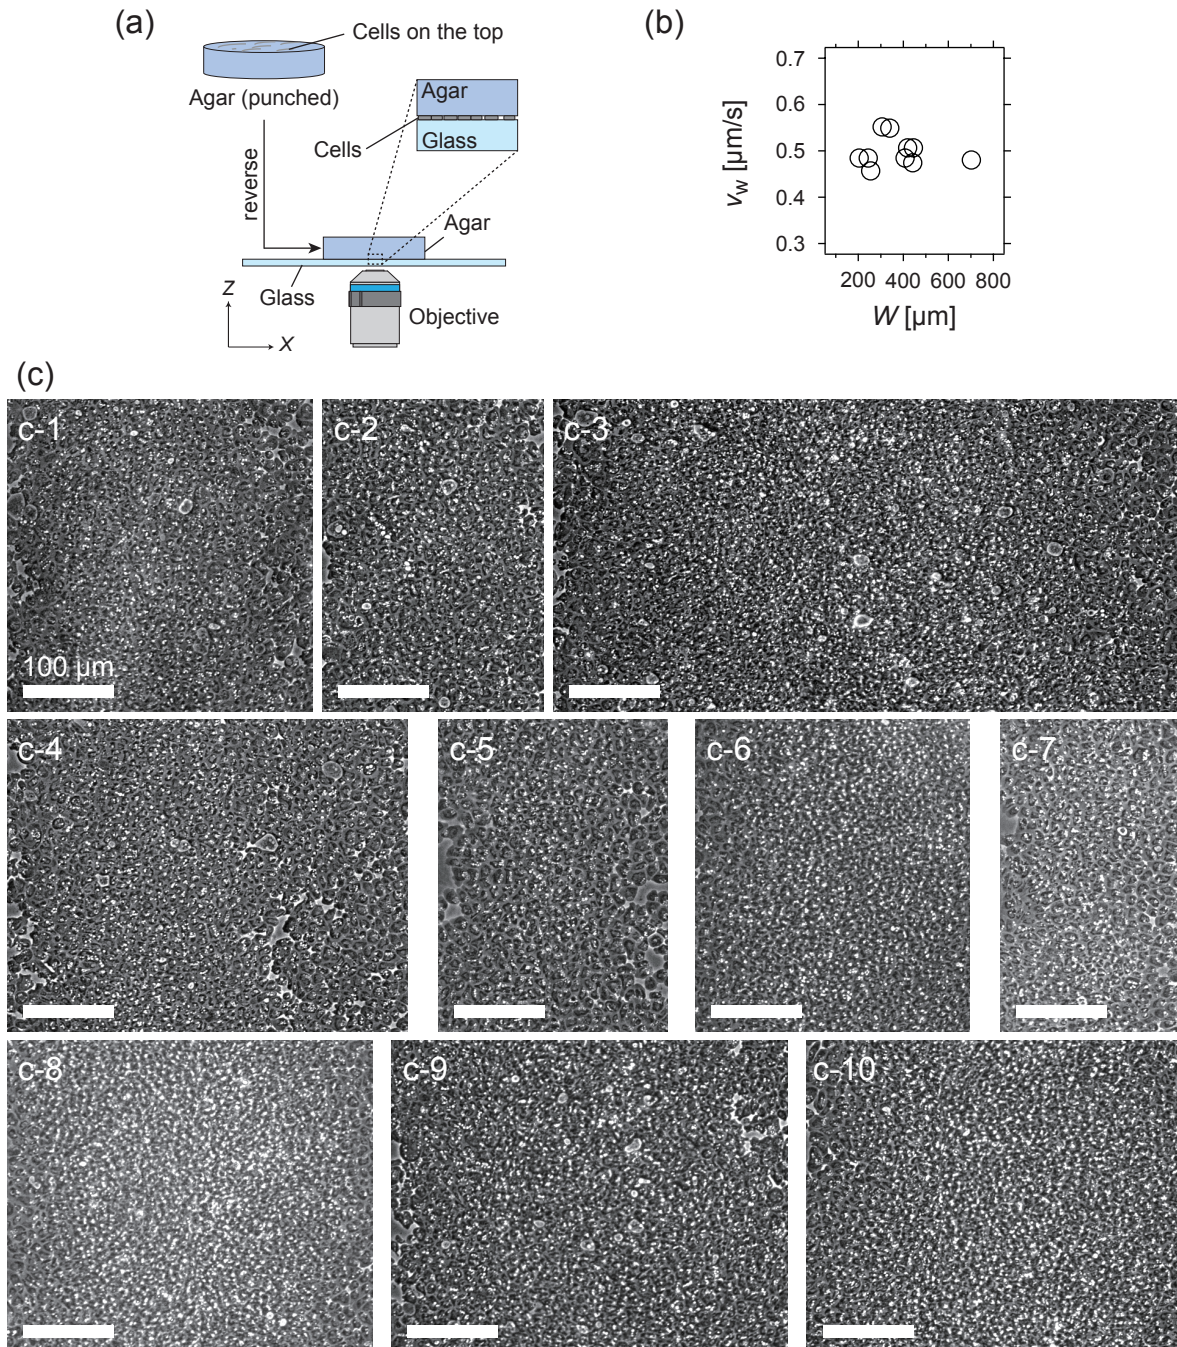

**Supplementary Figure 1** | (a) Experimental setup for the microscopic observation of the polar pattern formation. (b) Relationship between the propagation speed  $v_w$  and size of the wave  $W$ . (c) Snapshots of propagating band. The number of waves studied is  $N = 10$ . (c-1)  $W = 340 \mu\text{m}$ ; (c-2)  $W = 244 \mu\text{m}$ ; (c-3)  $W = 702 \mu\text{m}$ ; (c-4)  $W = 445 \mu\text{m}$ ; (c-5)  $W = 255 \mu\text{m}$ ; (c-6)  $W = 306 \mu\text{m}$ ; (c-7)  $W = 204 \mu\text{m}$ ; (c-8)  $W = 408 \mu\text{m}$ ; (c-9)  $W = 442 \mu\text{m}$ ; (c-10)  $W = 419 \mu\text{m}$ .

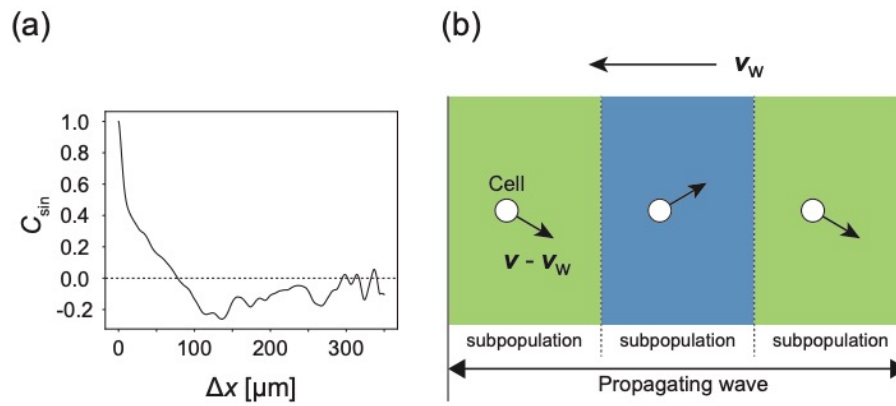

**Supplementary Figure 2 | (a) Autocorrelation function of transverse motion with respect to the wave propagation direction  $C_{\sin}(\Delta x)$ , indicating that the typical width of the stripe was around  $125 \mu\text{m}$ . (b) Illustration of the cell migration within the formed stripes in the co-moving frame. Arrows from cells indicate the direction of motion relative to the velocity vector of wave propagation.**

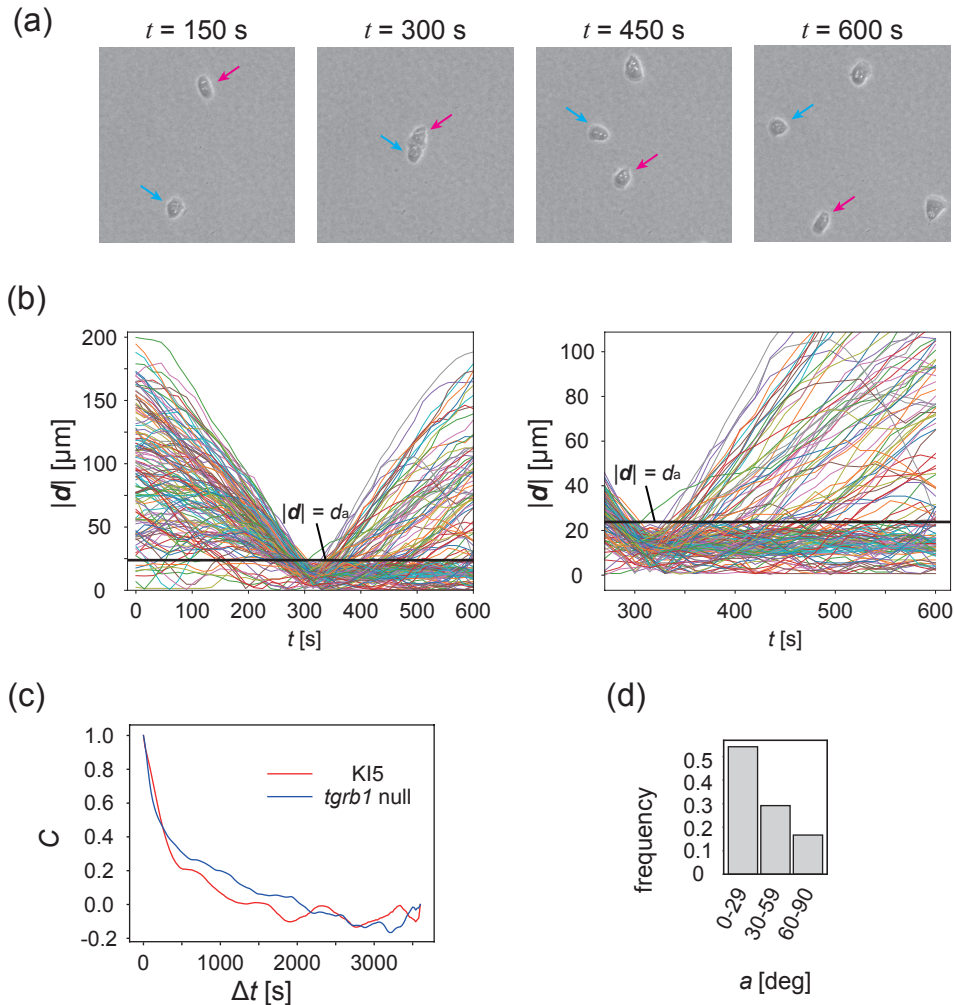

**Supplementary Figure 3** | (a) Another example of time evolution of collision of two cells. (b) Time series of distance between two cells  $|d|$ . Each line is a data obtained from different cell pairs. Black horizontal line means  $|d| = d_a$ . Time series of  $|d|$  after the collision ( $t = 300$ ) is magnified in the right panel. (c) The velocity auto-correlation functions  $C(\tau)$  of the isolated cells. Red line: KI cell. Blue line: *tgrb1* null mutant. (d) Histogram of the CFL angle  $a$  for the *tgrb1* null mutant cells that contact each other for  $>300$  sec.



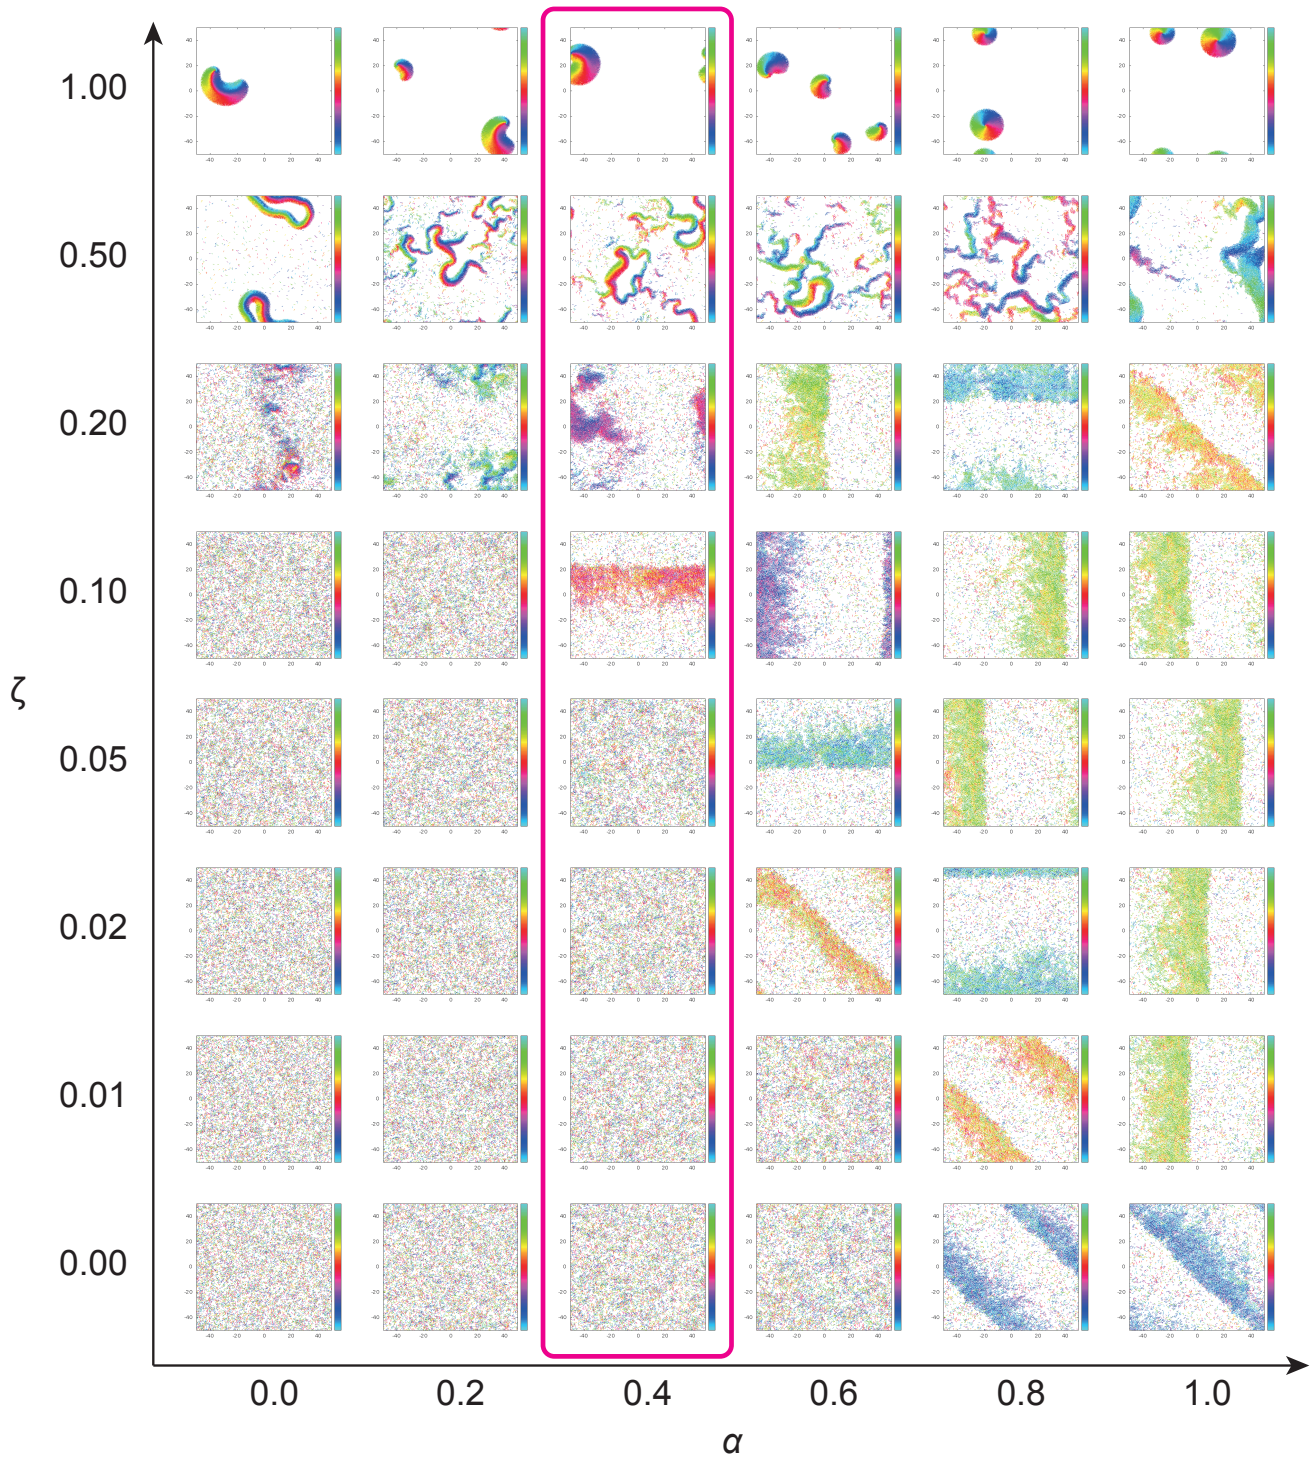

**Supplementary Figure 4** | Phase diagram of the agent-based simulation for changes of CFL  $\alpha$  and the alignment effect  $\zeta$ . A region where  $\alpha = 0.4$  is surrounded by the pink line.

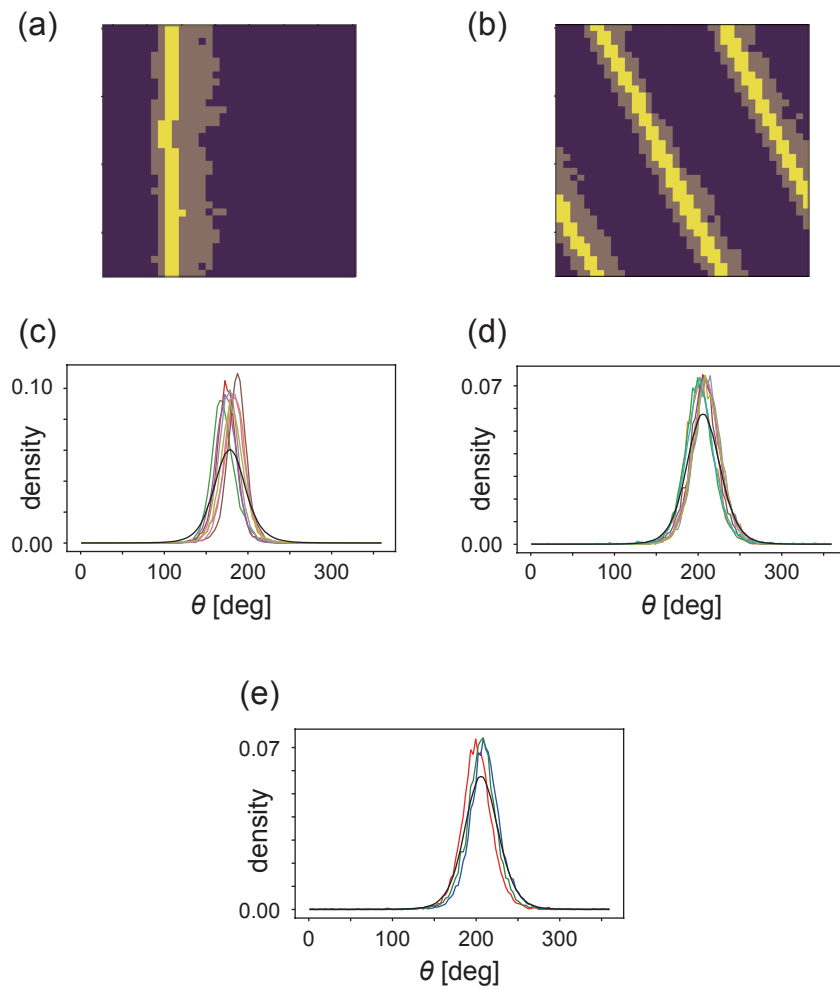

**Supplementary Figure 5** | (a, b) The regions of interest used in the analyses (bright yellow) within the wave (dark yellow) for (a) CFL-induced and (b) alignment-induced waves, respectively. Analysis method to pick up these ROIs is found in Methods. (c, d) Pdfs of the migration direction within the wave region with the top eight and nine peak probability densities for (c) CFL-induced and (d) alignment-induced waves, respectively. (e) Typical pdfs for alignment-induced waves extracted from (d).

**Supplementary Movie 1** | Macroscopic observation of the propagating bands.

The movie was taken every 15 min for 28.5 hours. Video acceleration: 11400 × real time.

**Supplementary Movie 2** | Microscopic observation of the propagating bands.

The movie was taken every 15 s for 1.66 hours. Video acceleration: 230 × real time.

**Supplementary Movie 3** | Propagating band with overlaying the coloring based on the optical flow analysis.

The movie was taken every 3 s for 39.5 min. Video acceleration: 151 × real time.

**Supplementary Movie 4** | Migration of the KI cells in the low-density region.

The movie was taken every 15 s for 2 hours. Video acceleration: 378 × real time.

**Supplementary Movie 5** | A binary collision of the KI cells in the low-density assay.

The movie was cropped from the movie of the low-density assay with a length of 10.25 min. Video acceleration: 153 × real time.

**Supplementary Movie 6** | Macroscopic observation of the population of *tgrb1* null mutant.

The movie was taken every 15 min for 28.5 hours. Video acceleration: 11400 × real time.

**Supplementary Movie 7** | Microscopic observation of the population of *tgrb1* null mutant.

The movie was taken every 15 s for 1.25 hours. Video acceleration: 225× real time.

**Supplementary Movie 8** | Propagating band formation generated in the agent-based simulation.

The color code indicates the migration direction of individual particle as shown in Fig 3c. Arrows indicate the direction of polarity.
